# Supplementary material
Source: HighWire-hosted journal article supplement (doi:10.1101/rna.043208.113)
Supplement: SuppFigLegends.docx [file SuppFigLegends.docx]

**Supplemental Figures**

**Figure S1: Quantifying AJ disassembly and assembly using asymmetry coefficient and %recovery analysis, related to Figure 1.** F-actin and AJ protein colocalization during MDCK cells Ca2+ switch experiments were quantified using E-cadherin, β-catenin, or α-catenin indirect immunofluorescence and phalloidin-actin staining. A) Deconvolved images of MDCK cells stained for E-cadherin (red) and F-actin (green) at steady state (SS), low Ca2+ (LC), and recovery (Rec180). E-cadherin/F-actin (yellow) colocalization at cell contact sites is evident at steady state and recovery. By contrast, E-cadherin/F-actin colocalization at cell contact sites is reduced following 1-hour in low Ca2+ media. B) Line-scans of the images in panel A showing strong correlation between E-cadherin and F-actin at cell contact sites at steady state and after 3-hours in Ca2+ recovery media. C) Graph of the asymmetry coefficient during Ca2+ switch experiments for colocalization between F-actin and E-cadherin (blue), α-catenin (red), and β-catenin (green), or AJ average (purple). At steady state, strong F-actin/AJ protein colocalization at cell contact sites yields asymmetry coefficient values greater than one (SS). Following low Ca2+ treatment, F-actin/AJ protein colocalization at cell contact sites was reduced yielding asymmetry coefficient values less than one (LC). Following 3-hours in Ca2+ recovery media, F-actin/AJ protein colocalization at cell contact sites return to near steady state levels yielding asymmetry coefficient values greater than one (Rec180). Graph of %recovery for Ca2+ switch experiments switch shown in D. Scale bars are 20 μm. Error bars show mean values ± SEM (n=3): *, p < 0.05.

**Figure S2: Total AJ protein levels do not vary significantly in the presence or absence of cycloheximide during Ca2+ switch experiments, related to Figure 1.** Western blot analysis of cell lysates prepared from MDCK cells during Ca2+ switch experiment show no significant change in AJ complex protein levels. (A-D) Graphs of AJ protein levels relative to steady state during Ca2+ switch experiments for E-cadherin (A), β-actin (B), β-catenin (C), and α-tubulin (a control) (D). SS-steady state, LC-Low Ca2+, Rec60 recovery 60 minutes, Rec60+Inh- Recovery 60 minutes plus cycloheximide, SS+Inh60-steady state incubated in cycloheximide for 60 minutes, Rec180-180 minutes in recovery media, Rec180+Inh-180 minutes in recovery media plus cycloheximide, SS+Inh180-steady state incubated in cycloheximide for 180 minutes. Error bars show mean values ± SD (n=3).

**Figure S3:** **Treatment with β-atin zipcode antisense oligonucleotides reduces cell periphery localization of full length β-actin mRNA during recovery from Ca2+ switch.** Fluorescence *In Situ* Hybridization (FISH) for β-actin eGFP mRNA in MDCK cells expressing full length β-actin eGFP. Cells were either untreated (A-C Control) or treated with β-actin zipcode antisense oligonucleotides (D-F Antisense Treatments). Cells in various phases of recovery following a Ca2+ switch were probed for β-actin eGFP mRNA localization – 30 minutes (A and D), 1 hour (B and E) and 2 hours (C and F). The yellow arrows point to transcription sites and the red arrowheads point to cell periphery localized β-actin eGFP mRNA. Scale Bar represents 20μm.

**Figure S4: TC-GFP-β-actin accumulates near cell-cell contact localized β-actin monomer synthesis sites.** (A) Deconvolved epifluorescence images of a single plane of MDCK cells after 3-hours in Ca2+ recovery media stained for *de novo* β-actin monomer synthesis (red) and mature GFP-β-actin (green). (B) Deconvolved epifluorescence images of a single plane of MDCK cells after 3-hours in Ca2+ recovery media containing 8μM antisense oligonucleotides, stained for *de novo* β-actin monomer synthesis (red) and mature GFP-β-actin (green).

**Figure S5: MDCK cells expressing FL-β-actin during recovery after a Ca2+ switch experiment.** (A) Deconvolved epifluorescence images of a single plane of MDCK cells 60 minutes after a Ca2+ experiment with FL β-actin (green) labeled with GFP and E-cadherin (red) labeled by immunofluorescence. (B) Deconvolved epifluorescence images of a single plane of MDCK cells 150 minutes after a Ca2+ experiment with FL β-actin (green) labeled with GFP and E-cadherin (red) labeled by immunofluorescence. Scale bars are 20 μm.

**Figure S6: β-actin mRNA zipcode oligonucleotides function similarly in wild type and stably transfected TC-GFP-β-actin full length expressing MDCK cells.** Graph of the % recovery of adherens junction assembly in wild type and in full length TC-GFP-β-actin expressing MDCK cells as a function of β-actin mRNA zipcode sense, scrambled, and antisense oligonucleotide treatment. Note the β-actin mRNA zipcode oligonucleotides affect the wild type and oligonucleotide treated cells similarly.

**Figure S7**: **β-actin mRNA zipcode oligonucleotides do not disrupt pre-existing epithelial adherens junction complexes.** Deconvolved epifluorescence images of a single plane of MDCK monolayers, FL β-actin (green) labeled with GFP and E-cadherin (red) labeled by immunofluorescence. Monolayers were treated with either sense (A), scrambled (B), or antisense (C) oligonucleotides for 3-hours. Scale bars are 20 μm.

**Figure S8: β-actin mRNA zipocode scrambled oligonucleotides do not inhibit MDCK adherens junction assembly.** (A) Deconvolved epifluorescence images of a single plane of MDCK cells during a Ca2+ switch experiment with full length TC-GFP-β-actin (green) labeled with GFP and E-cadherin (red) labeled by immunofluorescence treated with scrambled oligonucleotides for 3-hours post-contact. Scale bars = 20 µm.

**Figure S9: Perturbing β-actin zipcode activity alters cell physiology.** (A) Graph illustrating the length to width ratios of MDCK cells expressing FL β-actin, Δ3’UTR β-actin, FL β-actin with antisense treatment, FL β-actin with sense treatment, FL β-actin with Rho inhibitor, and FL β-actin with Src inhibitor. Error bars show mean values ± SD (n=5): *, p < 0.05.

**Figure S10: Src-1 inhibitor decreases the intensity of phospho-Src immunofluorescence staining.** (A) Graph illustrating the decrease of Phospho-Src fluorescence staining when and increased concentration of Src Inhibitor was added to MDCK cells. Note that the range for Src-1 inhibitor for specific Src inhibition is 44-88nM, a range given by the manufacturers (Sigma).
